# Supplementary material
Source: publisher site journal article supplement (https://www.dovepress.com/article/528323)
Supplement: Supplementary file 1 [file 528323%20Appendix%20A.docx]

**Appendix A**

**Survey for Youth and Student Baseball Coaches**

Date of Completion: ( ) Month ( ) Day

***Section A: Basic Information of the Respondent (Coach)***

Please provide your current personal information in the parentheses below.

- Age: ( ) years old

- Gender: □ Male / □ Female

- Years of playing experience: ( ) years

- Years of coaching experience: ( ) years

- □ Volunteer / □ Not a volunteer

- □ Parent of a player / □ Not a parent of a player

***Section B: Team Information***

Please answer questions about your team by checking the appropriate boxes and filling in the information in parentheses.

- Team Name: ( )

- Number of games per year:

□ ~20 □ 21–50 □ 51–70 □ 71 and above

- Number of games:

□ Too many □ Somewhat many □ Appropriate □ Somewhat few □ Too few

- Weekly practice schedule (fill in the number of minutes for each day excluding travel time and game days)

Monday: ( ) min Tuesday: ( ) min Wednesday: ( ) min

Thursday: ( ) min Friday: ( ) min Saturday: ( ) min Sunday: ( ) min

- Warm-up before practice: □ Yes □ No

→ If yes: ( ) minutes

Activities: □ Running □ Stretching □ Others: ( )

- Cool-down after practice: □ Yes □ No

→ If yes: ( ) minutes

Activities: □ Stretching □ Massage □ Others: ( )

- Is there an off-season with no pitching? □ Yes □ No

- Number of pitches per day:

In practice: ( ) pitches

In games: ( ) pitches

Number considered appropriate: ( ) pitches

- Number of players (3rd–6th grade): ( ) players

- Number of coaches: ( ) people

- Gender ratio of players (3rd–6th grade): Male ( ): Female ( )

- Do you modify coaching methods based on gender? □ Yes □ No

- Primary playing positions (3rd–6th grade):

□ Pitchers: ( ) □ Catchers: ( ) □ Infielders: ( ) □ Outfielders: ( )

- Are there any players whose pitching form concerns you? (3rd–6th grade)

□ Pitchers: ( ) □ Catchers: ( ) □ Infielders: ( ) □ Outfielders: ( )

(Continued...)

***Section C: Survey on the Frequency of Elbow Injuries***

Please answer the following questions about the frequency of elbow injuries on your team by checking the appropriate boxes and filling in the information in parentheses.

- Number of players with elbow pain in the past year by grade and position:

3rd Grade:

□ Pitchers: ( ) □ Catchers: ( ) □ Infielders: ( ) □ Outfielders: ( )

4th Grade:

□ Pitchers: ( ) □ Catchers: ( ) □ Infielders: ( ) □ Outfielders: ( )

5th Grade:

□ Pitchers: ( ) □ Catchers: ( ) □ Infielders: ( ) □ Outfielders: ( )

6th Grade:

□ Pitchers: ( ) □ Catchers: ( ) □ Infielders: ( ) □ Outfielders: ( )

- Among those who reported elbow pain, are there any players whose pitching form concerns you?

□ Pitchers: ( ) □ Catchers: ( ) □ Infielders: ( ) □ Outfielders: ( )

- If known, indicate the length of baseball experience of those who reported elbow pain:

□ Less than 1 year: ( ) □ Up to 2 years: ( ) □ Up to 3 years: ( )

□ Up to 4 years: ( ) □ Up to 5 years: ( ) □ More than 5 years: ( )

- How did you respond to the player’s report of pain? (check all that apply)

□ Allowed them to continue playing

□ Stopped them from playing

□ Let them decide whether to continue

□ Sent them to a hospital

□ Monitored until pain subsided

□ Others: ( )

- Did you consult with the player’s parent/guardian when they reported pain? □ Yes □ No

- What do you think caused the pain? (check all that apply)

□ Pitching form □ Overuse □ Underdeveloped bones/muscles

□ Ball characteristics (e.g., size, weight) □ Nutrition □ Physical constitution □ Others: ( )

→ If “overuse,” where did it occur? □ Practice □ Games □ At home

→ If “in games,” what was the reason for overuse?

□ Consecutive pitching due to schedule

□ Large number of games in a season

□ Lack of available players

□ For training pitchers/catchers

□ Others: ( )

Section D: Awareness and Knowledge of Coaches

Please respond by checking the appropriate boxes and filling in the blanks as applicable.

- Are you aware of the pitching limits proposed by the Japanese Clinical Sports Medicine Society in 1995

(Max. 50 full-effort pitches per day and 200 per week for elementary school students)?

□ Yes □ No → If “Yes,” do you adhere to the pitch limits? □ Yes □ No

→ If “No,” why not? Reason: ( )

- Are you aware that “Little League Elbow” is not a specific diagnosis but a general term for injuries caused by pitching, and can be classified into:

1) Medial epicondyle injuries (over 90% of cases)

2) Osteochondritis dissecans of the capitellum (more severe)?

□ Yes □ No

- Are you aware that the injury site and pathology differ significantly between children (whose bones are still developing) and adults (whose bones have matured)?

□ Yes □ No

- Are you aware that throwing breaking balls places greater stress on the elbow than fastballs?

□ Yes □ No

- Are you aware that pitching with the elbow lower than shoulder level increases the risk of elbow injury?

□ Yes □ No

- Are you aware that a thumb-up takeaway motion in pitching places more stress on the elbow than a pinky-up motion?

□ Yes □ No

- Are you aware that early-stage elbow injuries in elementary school players have a 90% recovery rate if pitching is stopped early, compared to 50% in later stages, and that players typically visit the hospital in the later stage?

□ Yes □ No

- Are you aware that stretching the forearm (from elbow to wrist) helps prevent Little League Elbow?

□ Yes □ No

- Are you aware that flexibility and strength in the lower limbs are also important for injury prevention?

□ Yes □ No

- Have you ever participated in seminars or workshops on injury prevention?

□ Yes □ No

- Have you ever attended coaching or performance enhancement seminars or workshops?

□ Yes □ No

- Are you implementing any other initiatives for injury prevention?

( )

***Section E: Regional and Prefectural Initiatives***

Please answer the following questions regarding local or prefectural efforts.

- Are there any initiatives in your region or prefecture for preventing elbow injuries or other injuries in youth baseball? □ Yes □ No

→ If “Yes,” what are the initiatives?

( )

Do you have any comments or opinions about these initiatives?

( )

→ If “No,” would you like to see initiatives implemented?

□ Yes □ No

→ If “Yes,” what kind of initiatives would you like to see?

( )

Section F: Other Comments

If you have any requests for healthcare professionals, opinions on injury prevention or the current youth baseball system, or any issues you are facing in the field, please feel free to write them below.

( )

End of survey. Thank you very much for your cooperation.
